# Supplementary material for: Crystal structures and chiral recognition of the diastereomeric salts prepared from 2-methoxy-2-(1-naphthyl)propanoic acid
Source: Royal Society of Chemistry journal article supplement (doi:10.1039/c1ce05155e), 2011-01-01
Supplement: c1ce05155e.pdf [file c1ce05155e.pdf]

**Table 4 (Supplement)** NMR data for amides **11** and **12**

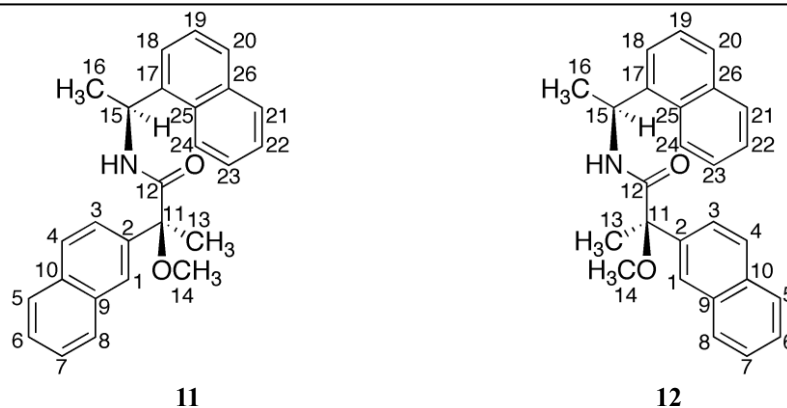

| Position | <sup>13</sup> C (201 MHz) | <sup>1</sup> H (800 MHz)              | <sup>13</sup> C (201 MHz) | <sup>1</sup> H (800 MHz)              |
|----------|---------------------------|---------------------------------------|---------------------------|---------------------------------------|
| C1       | 125.60                    | 7.94 (1H, br s)                       | 125.79                    | 7.79 (1H, m)                          |
| C2       | 138.29                    | –                                     | 137.77                    | –                                     |
| C3       | 123.94                    | 7.57 (1H, dd, <i>J</i> = 8, 2 Hz)     | 124.17                    | 7.36 (1H, dd, <i>J</i> = 8, 2 Hz)     |
| C4       | 128.21                    | 7.86 (1H, m)                          | 128.02                    | 7.68 (1H, br d, <i>J</i> = 8 Hz)      |
| C5       | 127.50                    | 7.84 (1H, m)                          | 127.41                    | 7.79 (1H, m)                          |
| C6       | 126.18                    | 7.49 (1H, m)                          | 126.12                    | 7.46 (1H, m)                          |
| C7       | 126.11                    | 7.49 (1H, m)                          | 125.97                    | 7.46 (1H, m)                          |
| C8       | 128.31*                   | 7.87 (1H, m)                          | 128.31                    | 7.70 (1H, m)                          |
| C9       | 133.10                    | –                                     | 133.01                    | –                                     |
| C10      | 132.90                    | –                                     | 132.91                    | –                                     |
| C11      | 81.97                     | –                                     | 81.92                     | –                                     |
| C12      | 172.26                    | –                                     | 172.09                    | –                                     |
| C13      | 20.41                     | 1.85 (3H, s)                          | 20.07                     | 1.94 (3H, s)                          |
| C14      | 51.18                     | 3.10 (3H, s)                          | 51.04                     | 3.13 (3H, s)                          |
| C15      | 44.29                     | 5.90 (1H, dq, <i>J</i> = 8.5, 7 Hz)   | 44.32                     | 5.83 (1H, dq, <i>J</i> = 8.3, 7 Hz)   |
| C16      | 20.61                     | 1.61 (3H, d, <i>J</i> = 7 Hz)         | 20.37                     | 1.73 (3H, d, <i>J</i> = 7 Hz)         |
| C17      | 138.39                    | –                                     | 137.99                    | –                                     |
| C18      | 122.58                    | 7.56 (1H, br d, <i>J</i> = 7 Hz)      | 122.54                    | 7.48 (1H, br d, <i>J</i> = 7 Hz)      |
| C19      | 125.21                    | 7.48 (1H, m)                          | 125.02                    | 7.40 (1H, m)                          |
| C20      | 128.30*                   | 7.82 (1H, br d, <i>J</i> = 8 Hz)      | 128.31                    | 7.78 (1H, br d, <i>J</i> = 8 Hz)      |
| C21      | 128.74                    | 7.88 (1H, br d, <i>J</i> = 8 Hz)      | 128.48                    | 7.83 (1H, br d, <i>J</i> = 8 Hz)      |
| C22      | 125.84                    | 7.51 (1H, ddd, <i>J</i> = 8, 7, 1 Hz) | 125.75                    | 7.40 (1H, m)                          |
| C23      | 126.42                    | 7.55 (1H, ddd, <i>J</i> = 8, 7, 1 Hz) | 126.38                    | 7.16 (1H, ddd, <i>J</i> = 8, 7, 1 Hz) |
| C24      | 123.56                    | 8.13 (1H, br d, <i>J</i> = 8 Hz)      | 123.63                    | 7.78 (1H, br d, <i>J</i> = 8 Hz)      |
| C25      | 131.20                    | –                                     | 131.25                    | –                                     |
| C26      | 133.90                    | –                                     | 133.79                    | –                                     |
| NH       | –                         | 7.25 (1H, m)                          | –                         | 7.25 (1H, m)                          |

Solvent: chloroform-*d*. \*Assignment interchangeable.
